# Supplementary material
Source: PubMed Central journal article supplement (PMC3653562)
Supplement: supp_140.11.2422_DEV094227.pdf [file supp_140.11.2422_DEV094227.pdf]

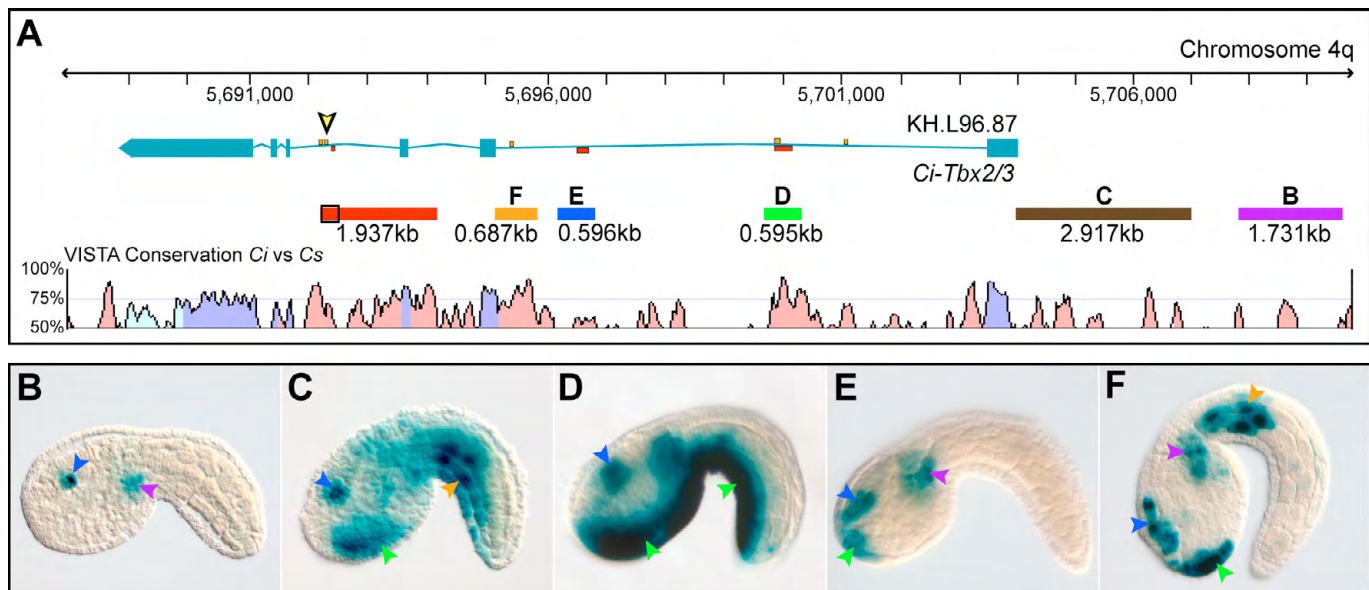

**Fig. S1. Identification of CRMs with activity in *Ci-Tbx2/3* expression domains outside the notochord.** (A) Top: map of the *Ci-Tbx2/3* locus. Teal rectangles and lines denote exons and introns, respectively. Areas with at least threefold enrichment for Ci-Bra and Ci-Tbx6b binding, ascertained from CHIP-chip data (Kubo et al., 2010), are shown as small red and orange boxes, respectively, within the *Ci-Tbx2/3* locus. The locations of the various CRMs tested are indicated by large boxes of different colors. The letters above each box indicate the panels showing representative transgenic embryos carrying that CRM (B-F). The 1937 kb notochord CRM (Fig. 2) is shown in red for reference; the minimal notochord enhancer is outlined in black and this area of the locus is further highlighted with a yellow arrowhead. Bottom: VISTA alignment illustrating the sequence conservation across the *Ci-Tbx2/3* locus between *Ciona intestinalis* (*Ci*) and *Ciona savignyi* (*Cs*), obtained using the following parameters: calculation window, 100 bp; minimum conservation width, 100 bp; conservation identity, 50%. Conserved coding regions are depicted as blue peaks, conserved portions of the 5'- or 3'-UTR are shown in aqua, whereas the conserved non-coding regions are illustrated as pink peaks. (B-F) X-Gal staining of *Ciona intestinalis* mid-tailbud stage embryos electroporated with the *Ci-Tbx2/3* CRMs indicated in A with staining in discrete regions of the sensory vesicle (B-F), ventral trunk epidermis (C,D) and palps (E,F). Expression domains are highlighted with arrowheads colored as follows: orange, muscle; blue, CNS; green, epidermis; purple, mesenchyme.

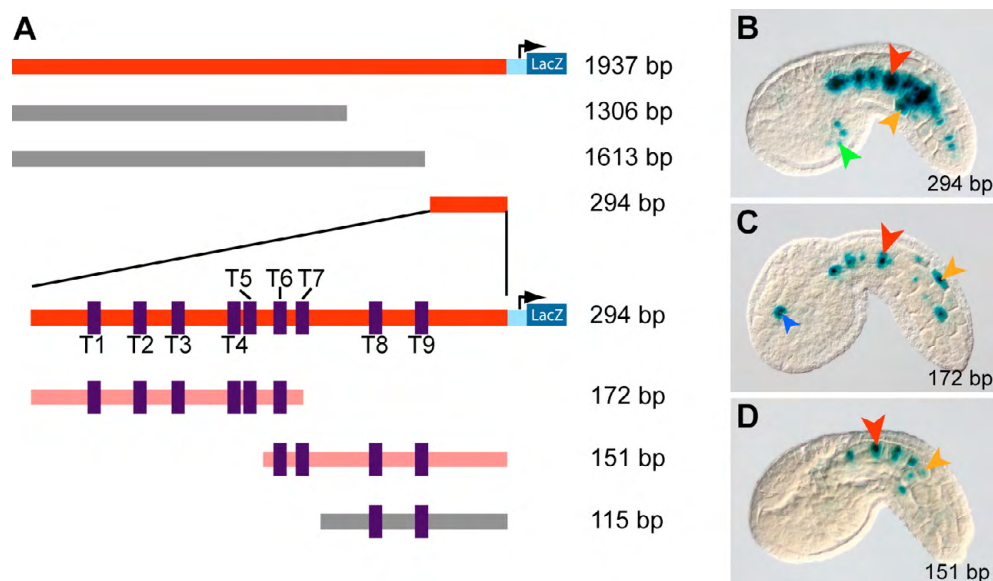

**Fig. S2. Constructs used to define the *Ci-Tbx2/3* notochord CRM.** (A) Schematic representation of the constructs tested to characterize the sequences controlling the activity of the *Ci-Tbx2/3* notochord CRM. Red and gray boxes represent fragments exhibiting or lacking notochord expression of the *lacZ* reporter, respectively. Light-red boxes depict constructs with weakened notochord staining. T-box binding sites are illustrated as purple rectangles. (B-D) Microphotographs of representative X-Gal stained embryos harboring select constructs from A.

**A**

```

Ci  GGGGAATGGGGATTACGGTAGTCGACGAAAAATAAATTGTTTCGGTTTAGTGCTATGTATT
      |||||
Cs  CAAAGCAACGGATTAT-----CGGAAAATAAATTGTTTTTCTT-----CGTTGTATT
      |||||

Ci  ACTCGACCACCAAAGATGTGAAAGCCACGCAGTTGATCTAGCGTTAGATTTTCGCCCTTC
      |||||
Cs  AC-----CACCACCAACGTGATACCCGCGCAGTTGATTGGCGTCATAATTCGCGCGTTC
      |||||

      T7          T6          T5
Ci  GTGTTATTTGTCTTGTCACATTGCTTATAGATTAACACTTACGTGTCAGAGAATAAAC-
      |||||
Cs  GTGTCATTTGTCTGATCGCGCAATTGGGCGAGTAACACTGAAGTGACAACGAAAAGCCA

Ci  ----CGTTTTATTTTATAACTAGTCCCACTATACGAATAAACACAAGTGTCATAAAGTAC
      |||||
Cs  TCAGCTTTATAATTTCTCGTTTAGCGTTCTCTACGAA-AATTACCATTTTATTTAAACCG

Ci  AATACTGTGC-TGGGTGGCAAATGAACTTTGTAACGTATTTAACTACCCTGTCTGTCCAC
      |||||
Cs  ACCATAATGCATAGGTAACA-----CTTTCTTAGCAAAACAGTGTGTT----
  
```

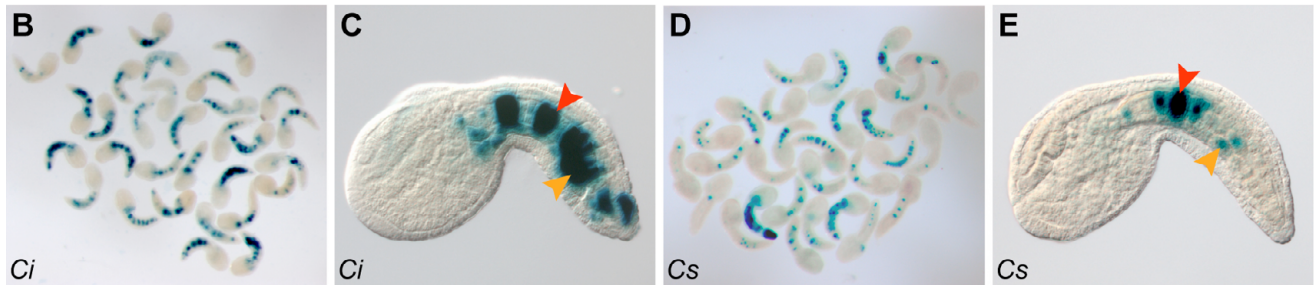

**Fig. S3. Interspecific conservation of the *Ci-Tbx2/3* 294-bp notochord CRM.** (A) Sequence alignment of the *Ciona intestinalis* (*Ci*) 294-bp *Ci-Tbx2/3* notochord CRM with the corresponding region of *Ciona savignyi* (*Cs*), as obtained from the whole-genome VISTA alignment between the two species (<http://pipeline.lbl.gov/cgi-bin/gateway2>). The T-box sites are highlighted in red in *Ci* and in pink in *Cs*. The T-box sites found to significantly contribute to notochord activity in *Ci* (T5, T6 and T7) are indicated in bold. (B-E) Group (B,D) and individual (C,E) microphotographs of *Ci* (B,C) and *Cs* (D,E) embryos electroporated with the 294 bp *Ci-Tbx2/3* notochord CRM. Red arrowheads indicate stained notochord cells, whereas orange arrowheads denote muscle activity.

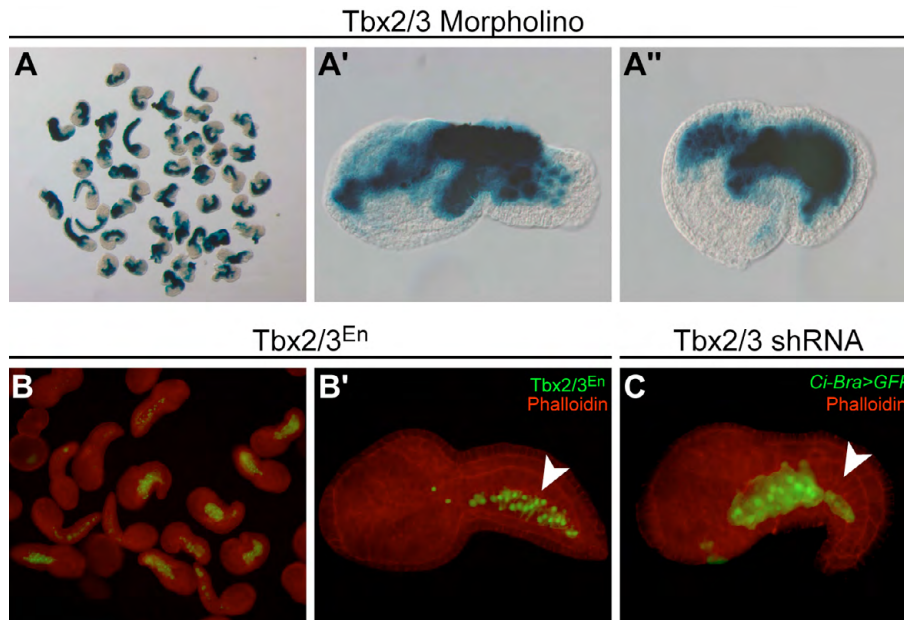

**Fig. S4. Phenotypes induced through knockdown or expression of a repressor form of *Ci-Tbx2/3*.** (A-A'') Group (A) and individual (A', A'') microphotographs of embryos co-injected at the one-cell stage with an antisense morpholino oligonucleotide directed against *Ci-Tbx2/3* and the *Ci-Bra > lacZ* notochord reporter (blue staining). (B, B') Group (B) and individual (B') photos of embryos expressing *Ci-Bra > Tbx2/3<sup>En</sup>::GFP*. (C) Embryo co-electroporated with the *Ci-Bra > GFP* notochord marker and an shRNA plasmid targeting *Ci-Tbx2/3*. Embryos in B-C have been counterstained with rhodamine-phalloidin. White arrowheads in B' and C denote normal non-transgenic notochord cells.

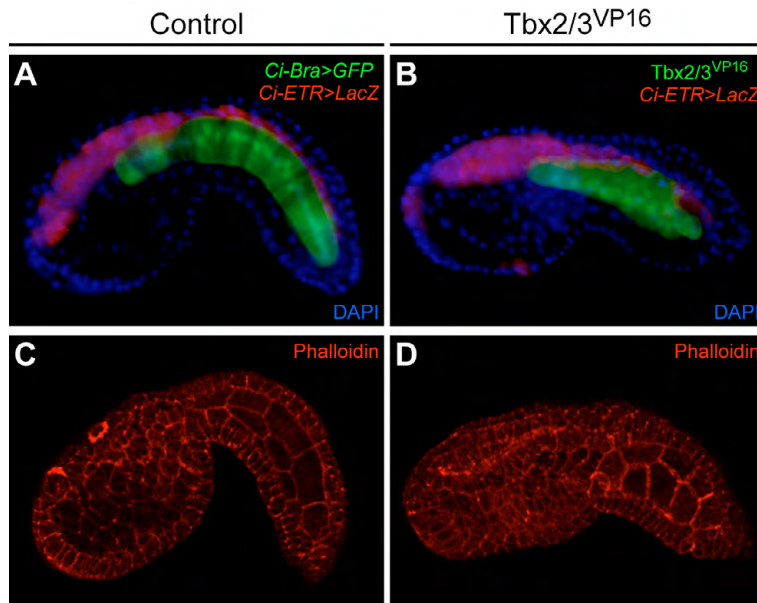

**Fig. S5. Effects of expression of altered forms of *Ci-Tbx2/3* in the notochord on surrounding tissues.** (A, B) Immunofluorescence of embryos co-electroporated with the *Ci-ETR > lacZ* plasmid (red), which directs expression throughout the sensory vesicle and nerve cord, and either *Ci-Bra > GFP* (A, control) or the *Ci-Tbx2/3<sup>VP16</sup>* construct (B), both green. Nuclei are counterstained in blue with DAPI. (C, D) Confocal stacks selected from the embryos shown in Fig. 4G, H, displaying a comparison between muscle cells from the control (C) and *Ci-Tbx2/3<sup>VP16</sup>* transgenic embryos (D). Cell boundaries are highlighted by phalloidin staining (red).

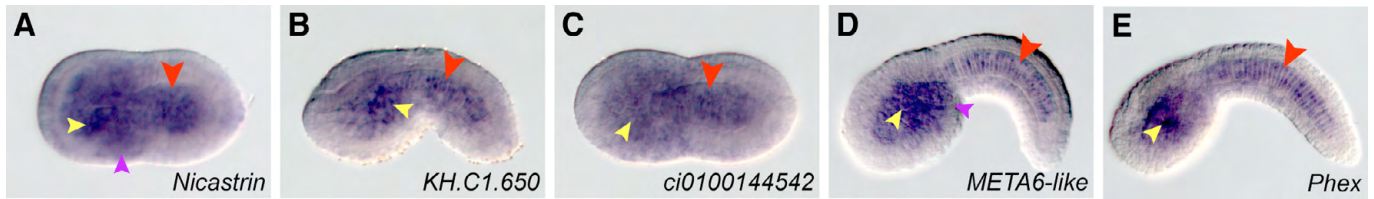

**Fig. S6. Expression patterns of additional Ci-Tbx2/3 notochord targets identified via microarray screen.** (A-E) Whole-mount *in situ* hybridization for the genes listed in the lower right corner of each panel. Territories stained are denoted by colored arrowheads as follows: red, notochord; purple, mesenchyme; yellow: endoderm. Larger arrowheads signal expression in domains matching that of *Ci-Tbx2/3* whereas smaller arrowheads denote expression in other areas.

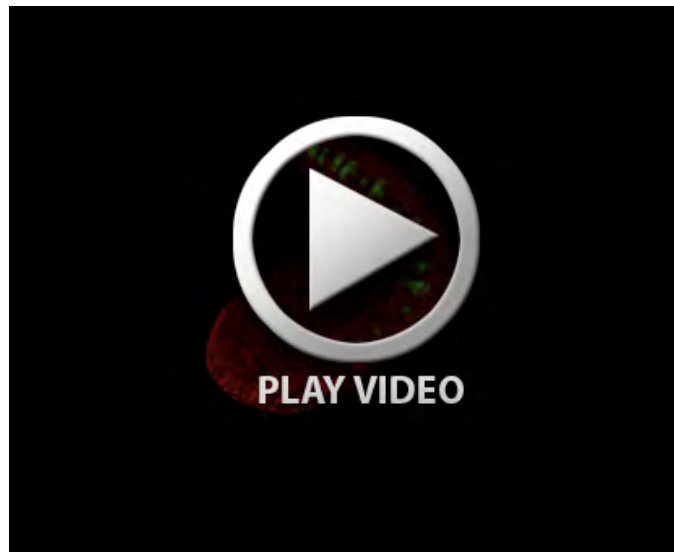

**Movie 1. Notochord morphology of a control embryo.** Three-dimensional confocal volume rendering of a mid-tailbud stage embryo expressing *Ci-Bra>GFP* (green) to highlight the notochord. The embryo has been counterstained with phalloidin (red) to mark cell boundaries.

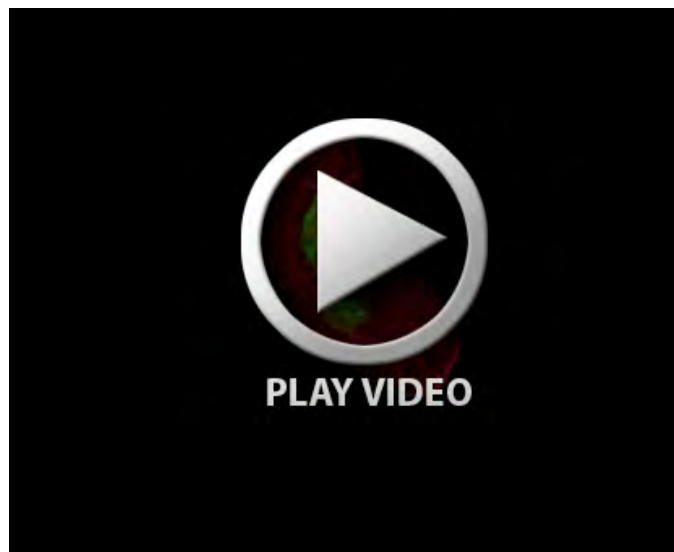

**Movie 2. Notochord morphology in a Ci-Tbx2/3<sup>VP16</sup> embryo.** Three-dimensional confocal volume rendering of a mid-tailbud stage embryo expressing a *Ci-Bra>Ci-Tbx2/3<sup>VP16</sup>::GFP* fusion gene (green) in the notochord. The embryo has been counterstained with phalloidin (red) to mark cell boundaries.

**Table S1. Non-notochord gene targets from microarray screen of embryos expressing *Tbx2/3*<sup>DBD</sup> or *Tbx2/3*<sup>VP16</sup>**

| Gene                                | KH gene model* | JGI v1.0 gene model | Data set          | Fold change <sup>‡</sup> | Pertinent expression domain(s) |
|-------------------------------------|----------------|---------------------|-------------------|--------------------------|--------------------------------|
| <i>Hif1an</i>                       | KH.C2.600      | ci0100143509        | DBD               | 4.91                     | Sensory vesicle                |
| <i>Rgs</i>                          | KH.C9.235      | ci0100139814        | DBD               | 3.57                     | Head epidermis                 |
| <i>Uncharacterized transcript</i>   | KH.C14.122     | ci0100150875        | VP16 <sup>§</sup> | -3.01                    | Sensory vesicle                |
| <i>SLC20a</i>                       | KH.S1022.1     | ci0100142796        | VP16              | 2.89                     | Sensory vesicle                |
| <i>SCO-spondin</i>                  | KH.L144.2      | ci0100140956        | VP16 <sup>§</sup> | -2.67                    | Nerve cord                     |
| <i>ATP6V1E1/2</i>                   | KH.C13.308     | ci0100144075        | DBD               | 2.65                     | Sensory vesicle                |
| <i>CathepsinH</i>                   | KH.C3.765      | ci0100135797        | DBD               | -2.42                    | Sensory vesicle, nerve cord    |
| <i>LRP-like</i>                     | KH.C1.1037     | ci0100131948        | DBD               | 2.27                     | Sensory vesicle                |
| <i>Claudin gene family member 3</i> | KH.C11.627     | ci0100140153        | VP16              | 2.22                     | Sensory vesicle                |
| <i>TRAF-3-like-1</i>                | KH.S2039.1     | ci0100142385        | VP16              | 2.11                     | Sensory vesicle                |
| <i>Amid</i>                         | KH.C4.411      | ci0100151268        | VP16              | 2.07                     | Palps                          |

\*Satou et al., 2008.

<sup>‡</sup>Negative and positive scores denote a downregulation and upregulation, respectively, compared with *Bra*>*GFP* controls.

ZF, zinc-finger; v1.0, version 1.0; N/A, not applicable; DBD, DNA-binding domain (dominant negative).

<sup>§</sup>In these cases, *Tbx2/3*<sup>VP16</sup> appears to be acting as a dominant negative (see text).

**Table S2. Primers used for the characterization of *Ci-Tbx2/3* regulation and function**

| Primer/construct name                             | Primer sequence (5'-3')*              | Restriction site(s) used      |
|---------------------------------------------------|---------------------------------------|-------------------------------|
| <b>I. CRM identification</b>                      |                                       |                               |
| Tbx2/3 UR#1 (-3008 to -91) F                      | ATgcatgcTGCACATAAGCCAGTTTATCGCTG      | <i>SphI</i>                   |
| Tbx2/3 UR#1 (-3008 to -91) R                      | TGccatggATCTATGGAAAAGTTGAGTTCTAAGG    | <i>NcoI</i>                   |
| Tbx2/3 UR #2 (-5566 to -2872) F                   | TtctagaTTCGAGTCCGTCGTATATCACAC        | <i>XbaI</i>                   |
| Tbx2/3 UR #2 (-5566 to -2872) R                   | TggatccTGCGCTTTCCGCATACTCTAAAG        | <i>BamHI</i>                  |
| Tbx2/3 intron #1 cluster F                        | TtctagaGTTAGGGCTGCCATTTATCCGC         | <i>XbaI</i>                   |
| Tbx2/3 intron #1 cluster R                        | ATccatggCAGCCCTAACTTTTTTGCCAAGC       | <i>NcoI</i>                   |
| Tbx2/3 intron #3 cluster F (Notochord CRM 1-1937) | TtctagaCATGGTGCTTTGGACGCGTTACC        | <i>XbaI</i>                   |
| Tbx2/3 intron #3 cluster R (Notochord CRM 1-1937) | ATccatggGGAATGGGGATTACGGTAGTCGAC      | <i>NcoI</i>                   |
| <b>II. CRM minimization</b>                       |                                       |                               |
| 1-1306                                            | N/A                                   | <i>StyI</i>                   |
| 1-1613                                            | N/A                                   | <i>EcoNI/NcoI</i>             |
| 1644-1937 (294bp) F                               | AtctagaGTGGACAGACAGGGTAGTTAAATAC      | <i>XbaI/NcoI</i> <sup>‡</sup> |
| 1644-1815 (172bp) R                               | TAccatggGTTATTTGTTCTTGTCAACA          | <i>XbaI/NcoI</i> <sup>‡</sup> |
| 1787-1937 (151bp) F                               | AtctagaCTATAAGCAATGTGACAAG            | <i>XbaI/NcoI</i> <sup>‡</sup> |
| 1823-1937 (115bp) F                               | AtctagaGGCGAAATCTAACGCTAGATCAAC       | <i>XbaI/NcoI</i> <sup>‡</sup> |
| <b>III. Mutational analysis</b>                   |                                       |                               |
| 1644-1937 T5 F                                    | CTCTGACACGTAA <u>ata</u> TTAATCTATAAG | <i>XbaI/NcoI</i>              |
| 1644-1937 T5 R                                    | CTTATAGATTA <u>Aat</u> TTACGTGTCAGAG  |                               |
| 1644-1937 T6 F                                    | CTATAAGCAAT <u>tata</u> ACAAGAAC      | <i>XbaI/NcoI</i>              |
| 1644-1937 T6 R                                    | GTTCTTGT <u>tat</u> ATTGCTTATAG       |                               |
| 1644-1937 T7 F                                    | CAAGAACAATAA <u>tat</u> AAAGGGGCG     | <i>XbaI/NcoI</i>              |
| 1644-1937 T7 R                                    | CGCCCCTT <u>Aat</u> TATTTGTTCTTG      |                               |
| <b>IV. shRNA construction</b>                     |                                       |                               |
| Tbx2/3 shRNA #3 A1c                               | AGATGTGGATGGCGCTCCTAATTTTT            | <i>EcoRV/EcoRI</i>            |
| Tbx2/3 shRNA #3 A2c                               | aattAAAAATTAGGAGCGCCATCCACATCTGGAC    |                               |
| Tbx2/3 shRNA #3 S1c                               | TTAGGAGTGCCGTCCATATCTGTGTGCTGTCC      |                               |
| Tbx2/3 shRNA #3 S2c                               | AGCACACAGATATGGACGGCACTCCTAA          |                               |
| <b>V. Tbx2/3 full-length cDNA</b>                 |                                       |                               |
| Tbx2/3 cDNA 5' half F                             | TTCGGTTTATAGCATGTTAAAGTGTTGG          | <i>XhoI/PstI</i>              |
| Tbx2/3 cDNA 5' half R                             | GGGTAAGCCGCAGctgcagCACC               |                               |
| Tbx2/3 cDNA 3' half F                             | CAGGctgcagAAGCGAGCCACG                |                               |
| Tbx2/3 cDNA 3' half R                             | TTGAAGTTAAATTATTGAACAACCTTTTCGC       |                               |

\*Included restriction sites are in lowercase; mutated sites are lowercase and underlined.

<sup>‡</sup>Corresponding primer in the opposite direction is specific to the reporter plasmid.

| <b>Table S3. <i>Ci-Tbx2/3</i> target genes and ESTs used for target gene expression analysis</b> |                          |                            |                |                                                     |                         |
|--------------------------------------------------------------------------------------------------|--------------------------|----------------------------|----------------|-----------------------------------------------------|-------------------------|
| <b>Gene</b>                                                                                      | <b>KH gene model*</b>    | <b>JGI v1.0 gene model</b> | <b>EST</b>     | <b>Embryonic expression data source(s)</b>          | <b>Fig. 5A category</b> |
| <i>Atlastin</i>                                                                                  | KH.C12.101<br>KH.C12.437 | ci0100131717               | 16a03          | This study (Fig. 5B)                                | Notochord               |
| <i>SULT</i>                                                                                      | KH.C7.375                | ci0100133920               | 38i23          | (Christiaen et al., 2008)<br>(Fig. 5C)              | Notochord               |
| <i>FN1-cont.</i>                                                                                 | KH.C10.317               | N/A                        | 32i22          | This study (Fig. 5D)                                | Notochord               |
| <i>Thsd1-cont.</i>                                                                               | KH.C2.1123               | ci0100153405               | 10j14          | This study (Fig. 5E)                                | Notochord               |
| <i>MLKL</i>                                                                                      | KH.C4.411                | ci0100152391               | 27f21          | This study (Fig. 5F)                                | Notochord               |
| <i>Uncharacterized Transcript</i>                                                                | KH.C8.749                | N/A                        | 27a16          | This study (Fig. 5G)                                | Notochord               |
| <i>Uncharacterized Transcript</i>                                                                | KH.C12.600               | N/A                        | RT-PCR         | This study (Fig. 5H)                                | Notochord               |
| <i>Nicastrin</i>                                                                                 | KH.C1.1147               | ci0100130440               | 22a09          | (Satou et al., 2001)<br>and this study (Fig. S6A)   | Notochord               |
| <i>Uncharacterized Transcript</i>                                                                | KH.C1.650                | ci0100132205               | 12b13          | This study (Fig. S6B)                               | Notochord               |
| <i>Uncharacterized Transcript</i>                                                                | N/A                      | ci0100144542               | 38k04          | This study (Fig. S6C)                               | Notochord               |
| <i>Ci-META6-like</i>                                                                             | KH.S655.4                | ci0100144948               | 01j04          | This study (Fig. S6D)                               | Notochord               |
| <i>Phex</i>                                                                                      | KH.C12.669               | ci0100141711               | 31a06          | This study (Fig. S6E)                               | Notochord               |
| <i>Casp9-like</i>                                                                                | KH.C3.375                | ci0100130387               | 83K02          | (Satou et al., 2001)                                | Notochord               |
| <i>Fos-a</i>                                                                                     | KH.C11.314               | ci0100130316               | 63M13          | (José-Edwards et al., 2011)                         | Notochord               |
| <i>Noto4</i>                                                                                     | KH.L18.30                | ci0100138226               | 33g19          | (Hotta et al., 2000)                                | Notochord               |
| <i>ZF105</i>                                                                                     | KH.C2.23                 | ci0100143717               | 10o09          | (Miwata et al., 2006)                               | Notochord               |
| <i>GPV-like</i>                                                                                  | KH.C7.584                | ci0100154658               | 90M19          | This study (Fig. 5L)                                | Multiple Tbx2/3         |
| <i>Chd8/9</i>                                                                                    | KH.C12.278               | N/A                        | 25024          | (Kusakabe et al., 2002)<br>and this study (Fig. 5M) | Multiple Tbx2/3         |
| <i>Duox-c</i>                                                                                    | KH.C2.477                | ci0100134721               | 44c15          | This study (Fig. 5N)                                | Multiple Tbx2/3         |
| <i>Slc23a</i>                                                                                    | KH.C7.199                | ci0100152342               | 59M01          | (Kusakabe et al., 2002)<br>and this study (Fig. 5O) | Multiple Tbx2/3         |
| <i>Hif1an</i>                                                                                    | KH.C2.600                | ci0100143509               | 13l12          | This study (Table S1)                               | Non-Noto Tbx2/3         |
| <i>TRAF-3-like-1</i>                                                                             | KH.S2039.1               | ci0100142385               | 06o12          | This study (Fig. 5J)                                | Non-Noto Tbx2/3         |
| <i>Amid</i>                                                                                      | KH.C4.411                | ci0100151268               | 57l17          | This study (Fig. 5K)                                | Non-Noto Tbx2/3         |
| <i>Rgs</i>                                                                                       | KH.C9.235                | ci0100139814               | 27c19          | This study (Fig. 5I)                                | Non-Noto Tbx2/3         |
| <i>Slc20a</i>                                                                                    | KH.S1022.1               | ci0100142796               | 77A22          | This study (Table S1)                               | Non-Noto Tbx2/3         |
| <i>ATP6V1E1/2</i>                                                                                | KH.C13.308               | ci0100144075               | 17h02          | This study (Table S1)                               | Non-Noto Tbx2/3         |
| <i>LRP-like</i>                                                                                  | KH.C1.1037               | ci0100131948               | 46i12          | This study (Table S1)                               | Non-Noto Tbx2/3         |
| <i>Claudin gene family member 3</i>                                                              | KH.C11.627               | ci0100140153               | 33g09          | This study (Table S1)                               | Non-Noto Tbx2/3         |
| <i>CathepsinH</i>                                                                                | KH.C3.765                | ci0100135797               | 17b13<br>83K17 | This study (Table S1)                               | Non-Noto Tbx2/3         |
| <i>SCO-spondin</i>                                                                               | KH.L144.12               | ci0100140956               | RT-PCR         | This study (Table S1)                               | Non-Noto Tbx2/3         |
| <i>Uncharacterized transcript</i>                                                                | KH.C14.122               | ci0100150875               | 19l13          | This study (Table S1)                               | Non-Noto Tbx2/3         |
| <i>Ethel</i>                                                                                     | KH.C10.362               | N/A                        | 22c23          | This study                                          | Mesenchyme              |
| <i>Polr1b</i>                                                                                    | KH.C4.597                | ci0100131534               | 88J16          | This study                                          | Mesenchyme              |
| <i>I810029B16Rik</i>                                                                             | KH.C2.576                | ci0100140719               | 14k01          | This study                                          | Mesenchyme              |
| <i>Mcm7</i>                                                                                      | KH.C1.124                | ci0100147736               | 85K03          | (Kusakabe et al., 2002)<br>and this study           | Mesenchyme              |
| <i>Astacin</i>                                                                                   | KH.C9.212                | ci0100137601               | 67N08<br>13h05 | (Satou et al., 2001)<br>(Kusakabe et al., 2002)     | Mesenchyme              |
| <i>Eef2K</i>                                                                                     | KH.L18.61                | ci0100147355               | 80K10          | This study                                          | Mesenchyme              |

|                                     |                   |              |                |                                           |               |
|-------------------------------------|-------------------|--------------|----------------|-------------------------------------------|---------------|
| <i>Sqstm1</i>                       | KH.C9.881         | ci0100152432 | 82K10          | This study                                | Mesenchyme    |
| <i>Trappc6b</i>                     | KH.C14.493        | ci0100138847 | 20o12<br>73P21 | This study                                | Mesenchyme    |
| <i>Mccc1</i>                        | N/A               | ci0100151489 | 69K20          | This study                                | Mesenchyme    |
| KIAA0664                            | KH.C14.234        | ci0100151022 | 79N23<br>22o09 | (Satou et al., 2001)                      | Mesenchyme    |
| <i>B4GalT2b</i>                     | KH.L5.14          | ci0100130848 | 30d21          | This study                                | Mesenchyme    |
| <i>Uncharacterized Glycoprotein</i> | KH.C1.1051        | ci0100134090 | 37j01          | This study                                | Mesenchyme    |
| <i>Uncharacterized Transcript</i>   | KH.C2.853         | N/A          | 38o07          | This study                                | Mesenchyme    |
| <i>Uncharacterized Transcript</i>   | KH.L84.3          | N/A          | 26n02          | This study                                | Mesenchyme    |
| <i>Uncharacterized Transcript</i>   | KH.C3.501         | ci0100130481 | 28e07          | (Kusakabe et al., 2002)<br>and this study | Mesenchyme    |
| <i>Uncharacterized Transcript</i>   | KH.C1.935         | ci0100131404 | 64P22          | (Satou et al., 2001)                      | Mesenchyme    |
| <i>Uncharacterized Transcript</i>   | KH.L96.95         | N/A          | 44e10          | This study                                | Mesenchyme    |
| <i>Uncharacterized Transcript</i>   | KH.S1585.1        | ci0100138863 | 43l07          | This study                                | Mesenchyme    |
| <i>Apip</i>                         | KH.C1.417         | ci0100144911 | 92G24          | This study                                | Other tissues |
| <i>Duox-b</i>                       | KH.C1.5           | ci0100149417 | 73M12<br>15k18 | This study                                | Other tissues |
| <i>Mech3</i>                        | KH.C4.351         | N/A          | 26j17          | (Tassy et al., 2010)<br>and this study    | Other tissues |
| <i>Ptpn12/18 /22</i>                | KH.S424.10        | ci0100146073 | 43e20          | This study                                | Other tissues |
| <i>Mos</i>                          | KH.C2.835         | ci0100132839 | N/A            | (Satou et al., 2001)                      | Other tissues |
| <i>Aldh5</i>                        | KH.C3.588         | ci0100136576 | 71B04          | This study                                | Other tissues |
| <i>Ldh</i>                          | KH.C14.591        | ci0100149293 | 56M20          | (Tassy et al., 2010)                      | Other tissues |
| <i>Slc25a33/36</i>                  | KH.C1.90          | ci0100136825 | 19p09          | (Kusakabe et al., 2002)<br>and this study | Other tissues |
| <i>GPCR-like</i>                    | KH.C14.240        | ci0100143862 | 40o18          | This study                                | Other tissues |
| <i>CD36</i>                         | KH.L153.96        | ci0100147772 | 12k09<br>61M01 | This study                                | Other tissues |
| <i>B4GalT3</i>                      | KH.C10.488        | ci0100146739 | 45p23          | This study                                | Other tissues |
| <i>Acot2</i>                        | KH.C12.1          | ci0100138543 | 24j15          | This study                                | Other tissues |
| <i>Uncharacterized Transcript</i>   | KH.C14.355        | N/A          | 02o21          | This study                                | Other tissues |
| <i>Uncharacterized Transcript</i>   | KH.C7.89          | N/A          | 93M11          | This study                                | Other tissues |
| <i>Uncharacterized Transcript</i>   | KH.L142.1         | ci0100151283 | 02l10          | This study                                | Other tissues |
| <i>Uncharacterized Transcript</i>   | KH.C8.483         | ci0100133176 | 63B02          | This study                                | Other tissues |
| <i>Uncharacterized Transcript</i>   | KH.C14.36         | N/A          | 32c05          | This study                                | Other tissues |
| <i>Uncharacterized Transcript</i>   | KH.C12.235        | ci0100141785 | 28j18          | This study                                | Other tissues |
| <i>Uncharacterized Transcript</i>   | KH.C1.451<br>(v1) | N/A          | 09h04          | This study                                | Other tissues |
| <i>Uncharacterized Transcript</i>   | N/A               | N/A          | 74N01          | This study                                | Other tissues |



|                                         |            |                            |        |            |               |
|-----------------------------------------|------------|----------------------------|--------|------------|---------------|
| <i>Uncharacterized Transcript</i>       | KH.L20.3   | N/A                        | 66A24  | This study | Other tissues |
| <i>Laminin <math>\beta</math>2-like</i> | KH.C11.28  | ci0100131107               | 04j21  | N/A        | No signal     |
| <i>Nahoda-like</i>                      | KH.C4.350  | ci0100131465               | RT-PCR | N/A        | No signal     |
| <i>Plcxd2/3</i>                         | KH.L141.35 | ci0100133233               | RT-PCR | N/A        | No signal     |
| <i>Uncharacterized Transcript</i>       | KH.C12.430 | ci0100135710               | 01g18  | N/A        | No signal     |
| <i>Uncharacterized Transcript</i>       | N/A        | ci0100138339               | 60O09  | N/A        | No signal     |
| <i>Uncharacterized Transcript</i>       | KH.S1489.1 | ci0100142881               | N/A    | N/A        | Not assayed   |
| <i>Uncharacterized Transcript</i>       | KH.S1745.2 | N/A                        | N/A    | N/A        | Not assayed   |
| <i>Uncharacterized Transcript</i>       | KH.C11.582 | N/A                        | N/A    | N/A        | Not assayed   |
| <i>Uncharacterized Transcript</i>       | KH.C1.3    | ci0100149819               | N/A    | N/A        | Not assayed   |
| <i>Uncharacterized Transcript</i>       | N/A        | N/A<br>(GRAIL2005.756.3.1) | N/A    | N/A        | Not assayed   |
| <i>Uncharacterized Transcript</i>       | N/A        | N/A<br>(GRAIL2005.189.1.1) | N/A    | N/A        | Not assayed   |

\*Satou et al., 2008
